# Supplementary material
Source: publisher site journal article supplement (https://www.spandidos-publications.com/1797/downloadSupplementary)

Figure S1. Fluorescence activated cell sorting staining of mouse bone marrow mesenchymal stem cells. (A) Positive markers. (B) Negative markers.

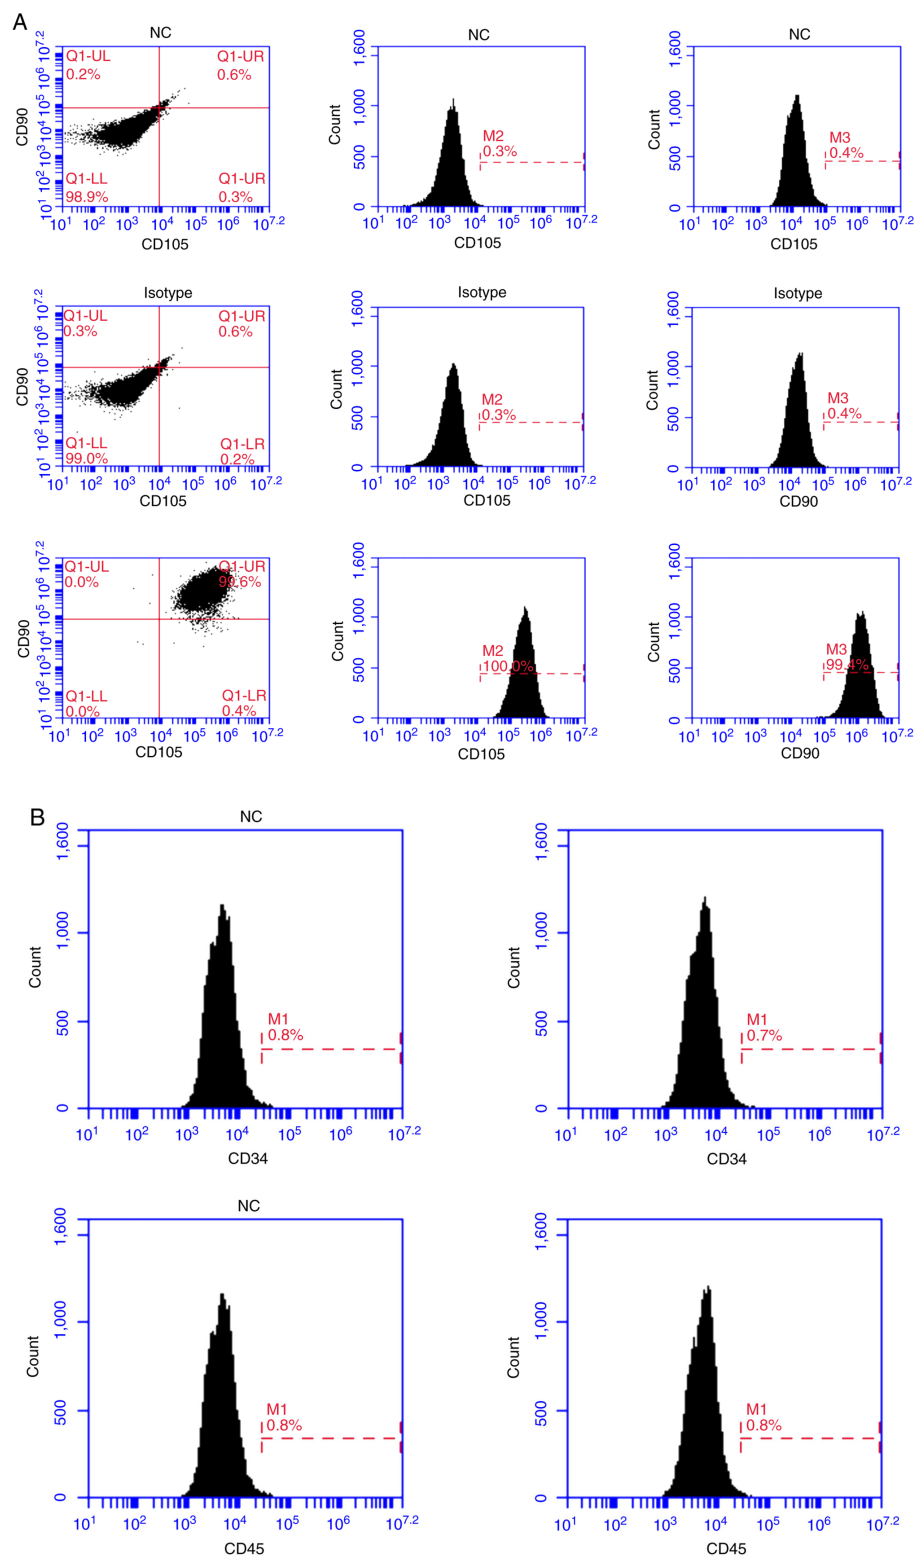

Supplement: Supplementary file 1 [file downloadSupplementary]
